# Supplementary material for: A miniaturized hydrogel-based in vitro model for dynamic culturing of human cells overexpressing beta-amyloid precursor protein
Source: PubMed Central journal article supplement — J Tissue Eng. 2020 Aug 18;11:2041731420945633. doi: 10.1177/2041731420945633 (PMC7446262; doi:10.1177/2041731420945633), 2020-08-18
Supplement: NEW_Supplementary_S1_Tunesi_et_al.pdf [file NEW_Supplementary_S1_Tunesi_et_al.pdf]

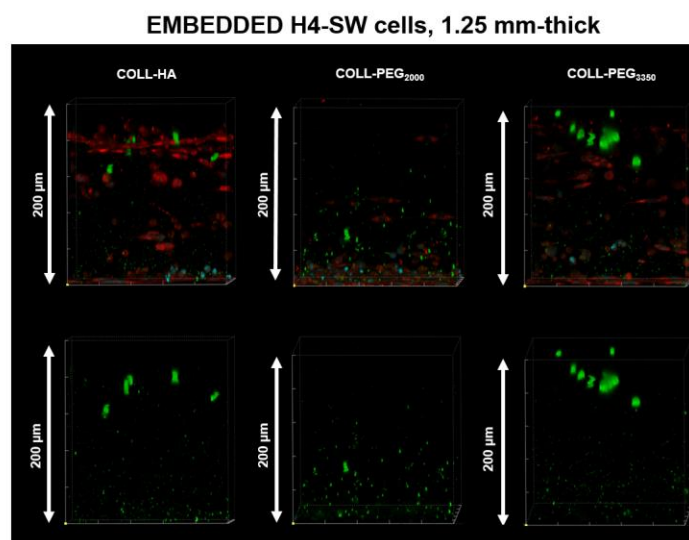

Immunofluorescence analysis by confocal microscopy for H4-SW cells embedded in 1.25-thick COLL-HA, COLL-PEG<sub>2000</sub> or COLL-PEG<sub>3350</sub> gels. For sample preparation, we diluted 9 parts (v/v) polymer solutions with 1 part (v/v) cell suspension ( $1 \cdot 10^5$  H4-SW cells/sample) and prepared 1.25 mm-thick samples. We stained cell nuclei with Hoechst 33342 (blue), cell membranes with a lipophilic tracer (red) and soluble amyloid fragments with 6E10 primary antibody (green). The upper panel shows the complete staining, while in the lower one we omitted the signals from cell membranes and nuclei to highlight the amyloid signal. The Z-axis for the representative volume of hydrogel samples was 200 µm.

**Supplementary material for:** *A miniaturized hydrogel-based in vitro model for dynamic culturing of human cells overexpressing beta-amyloid precursor protein*

**Journal name:** Journal of Tissue Engineering

**Author names:** Marta Tunesi, Luca Izzo, Ilaria Raimondi, Diego Albani, Carmen Giordano

**Correspondence to:** Carmen Giordano, Department of Chemistry, Materials and Chemical Engineering “G. Natta”, Politecnico di Milano, Piazza Leonardo da Vinci 32, 20133 Milan, Italy

Phone: +39.02.2399.3122

E-mail: [carmen.giordano@polimi.it](mailto:carmen.giordano@polimi.it)
